# Supplementary material
Source: HighWire-hosted journal article supplement (http://dmd.aspetjournals.org/highwire/filestream/66338/field_highwire_adjunct_files/1/Supplemental_Table_1_54296.pdf)
Supplement: Supplemental_Table_1_54296.pdf [file Supplemental_Table_1_54296.pdf]

Selective inhibition of cytochrome P450 2D6 by sarpogrelate and its active metabolite, M-1, in human liver microsomes. Doo-Yeoun Cho, Soo Hyeon Bae, Joeng Kee Lee, Yang Weon Kim, Bom-Taeck Kim, Soo Kyung Bae. *Drug Metabolism and Disposition*

**Supplemental Table 1.** Optimized mass parameters for the detection of metabolites of the nine P450-selective substrates and internal standard using cocktail assays on the API5500 Qtrap instruments

| P450s             | Substrates       | Concentration (μM) | Metabolites            | Transitions (m/z) | ESI mode | DP (eV) | CE (eV) |
|-------------------|------------------|--------------------|------------------------|-------------------|----------|---------|---------|
| 1A2               | Phenacetin       | 50                 | Acetaminophen          | 152 / 110         | +        | 50      | 20      |
| 2A6               | Coumarin         | 5                  | 7-Hydroxycoumarin      | 161 / 105         | -        | -90     | -30     |
| 2B6               | Bupropion        | 50                 | 6-Hydroxybupropion     | 256 / 238         | +        | 140     | 20      |
| 2C8               | Rosiglitazone    | 1                  | p-Hydroxyrosiglitazone | 374 / 151         | +        | 60      | 30      |
| 2C9               | Tolbutamide      | 100                | 4-Hydroxytolbutamide   | 285 / 104         | -        | -20     | -40     |
| 2C19              | S-Mephenytoin    | 100                | 4'-Hydroxymepheytoin   | 233 / 190         | -        | -45     | -20     |
| 2D6               | Dextromethorphan | 5                  | Dextrophan             | 258 / 157         | +        | 190     | 50      |
| 2E1               | Chlorzoxazone    | 50                 | 6-Hydroxychlorzoxazone | 184 / 120         | -        | -100    | -40     |
| 3A                | Midazolam        | 5                  | 1'-Hydroxymidazolam    | 342 / 203         | +        | 20      | 40      |
| Internal standard | Chlorpropamide   |                    |                        | 277 / 111         | +        | 120     | 20      |
|                   |                  |                    |                        | 275 / 190         | -        | -80     | -50     |

ESI, electrospray ionization; DP, declustering potential; CE, collision energy.

The Optimized ion spray voltage and temperature were set at ±5500 V and 500°C, respectively.
